# Supplementary material for: How clinician-patient communication affects trust in health information sources: Temporal trends from a national cross-sectional survey
Source: PubMed Central journal article supplement (PMC7906335; doi:10.1371/journal.pone.0247583), 2021-02-25
Supplement: pone.0247583.s001.pdf [file pone.0247583.s001.pdf]

| <i>Dependent variable:</i>                          |                               |                             |                                |                               |
|-----------------------------------------------------|-------------------------------|-----------------------------|--------------------------------|-------------------------------|
| Trust information about health topics from a doctor |                               |                             |                                |                               |
|                                                     | Hints 4 Cycle 1 (2011)        | Hints 4 Cycle 4 (2014)      | Hints 5 Cycle 1 (2017)         | Hints 5 Cycle 2 (2018)        |
| Patient Centered Communication                      | 2.687***<br>(1.723–4.189)     | 4.519***<br>(2.543–8.032)   | 5.760***<br>(2.679–12.384)     | 3.688**<br>(1.703–7.985)      |
| Region: Midwest                                     | .920<br>(.391–2.164)          | .768<br>(.313–1.886)        | .322*<br>(.114–.910)           | .442<br>(.116–1.680)          |
| Region: South                                       | .453*<br>(.225–.912)          | .653<br>(.299–1.428)        | .527<br>(.192–1.446)           | .482+<br>(.231–1.006)         |
| Region: West                                        | .418+<br>(.165–1.058)         | .854<br>(.411–1.776)        | .551<br>(.214–1.423)           | .772<br>(.226–2.641)          |
| Hispanic                                            | .587<br>(.230–1.495)          | .527<br>(.248–1.120)        | .477<br>(.201–1.135)           | .407<br>(.100–1.665)          |
| Non-Hispanic Black or African American              | 1.287<br>(.641–2.587)         | .496<br>(.153–1.608)        | .522<br>(.188–1.455)           | .557<br>(.271–1.144)          |
| Non-Hispanic Other                                  | .949<br>(.356–2.528)          | .439<br>(.106–1.829)        | .349+<br>(.104–1.165)          | .986<br>(.190–5.106)          |
| Hispanic Asian                                      | 1.246<br>(.395–3.933)         | .622<br>(.191–2.026)        | 1.891<br>(.117–30.527)         | 3.336<br>(.354–31.462)        |
| Age: 35-49                                          | .536<br>(.205–1.401)          | .830<br>(.367–1.877)        | .323<br>(.073–1.436)           | .449<br>(.103–1.962)          |
| Age: 50-64                                          | .488+<br>(.228–1.045)         | .927<br>(.456–1.886)        | .284*<br>(.085–.952)           | .460<br>(.146–1.447)          |
| Age: 65-74                                          | .593<br>(.286–1.230)          | .792<br>(.368–1.703)        | .198*<br>(.049–.807)           | .543<br>(.173–1.697)          |
| Age: 75+                                            | .464+<br>(.200–1.075)         | .985<br>(.421–2.308)        | .317<br>(.045–2.243)           | .562<br>(.166–1.909)          |
| Female                                              | 1.141<br>(.667–1.952)         | 1.521<br>(.926–2.499)       | 1.011<br>(.515–1.982)          | .876<br>(.444–1.731)          |
| Constant                                            | 43.833***<br>(16.477–116.604) | 17.758***<br>(8.235–38.294) | 121.290***<br>(27.657–531.911) | 80.332***<br>(29.195–221.037) |
| Observations                                        | 3,587                         | 3,039                       | 2,726                          | 2,921                         |
| Residual Deviance                                   | 1,350                         | 1,284                       | 805                            | 878                           |
| Null Deviance                                       | 1,420                         | 1,369                       | 885                            | 946                           |

*Note:*

+p<0.1; \*p<0.05; \*\*p<0.01; \*\*\*p<0.001

|                                        | <i>Dependent variable:</i>                       |                                    |                                    |                                   |
|----------------------------------------|--------------------------------------------------|------------------------------------|------------------------------------|-----------------------------------|
|                                        | Trust about health topics from family or friends |                                    |                                    |                                   |
|                                        | Hints 4 Cycle 1 (2011)                           | Hints 4 Cycle 4 (2014)             | Hints 5 Cycle 1 (2017)             | Hints 5 Cycle 2 (2018)            |
| Patient Centered Communication         | 1.199<br>(.941–1.528)                            | 1.271 <sup>+</sup><br>(.979–1.651) | 1.251*<br>(1.037–1.510)            | .866<br>(.650–1.154)              |
| Region: Midwest                        | .726 <sup>+</sup><br>(.516–1.021)                | .976<br>(.663–1.436)               | .688 <sup>+</sup><br>(.462–1.023)  | .863<br>(.580–1.284)              |
| Region: South                          | .857<br>(.604–1.214)                             | .879<br>(.591–1.307)               | .736<br>(.514–1.054)               | .898<br>(.646–1.248)              |
| Region: West                           | .836<br>(.593–1.178)                             | 1.080<br>(.747–1.561)              | .684 <sup>+</sup><br>(.469–.997)   | .870<br>(.602–1.256)              |
| Hispanic                               | .579**<br>(.403–.831)                            | .514**<br>(.354–.745)              | .936<br>(.600–1.458)               | .808<br>(.569–1.149)              |
| Non-Hispanic Black or African American | .829<br>(.537–1.278)                             | 1.264<br>(.790–2.023)              | .722 <sup>+</sup><br>(.508–1.025)  | 1.339<br>(.900–1.993)             |
| Non-Hispanic Other                     | 1.172<br>(.677–2.026)                            | 1.108<br>(.538–2.285)              | .980<br>(.501–1.916)               | 1.023<br>(.483–2.167)             |
| Hispanic Asian                         | .840<br>(.470–1.502)                             | 1.696<br>(.876–3.284)              | 1.679 <sup>+</sup><br>(.986–2.859) | 1.125<br>(.526–2.405)             |
| Age: 35-49                             | .784<br>(.543–1.131)                             | .926<br>(.621–1.381)               | .738 <sup>+</sup><br>(.539–1.012)  | 1.161<br>(.758–1.778)             |
| Age: 50-64                             | .601**<br>(.436–.829)                            | .881<br>(.614–1.265)               | .856<br>(.612–1.197)               | 1.002<br>(.655–1.532)             |
| Age: 65-74                             | .433***<br>(.296–.635)                           | .662 <sup>+</sup><br>(.438–.999)   | .707 <sup>+</sup><br>(.474–1.056)  | .666 <sup>+</sup><br>(.423–1.048) |
| Age: 75+                               | .530**<br>(.351–.800)                            | .612*<br>(.390–.959)               | .606*<br>(.403–.911)               | .976<br>(.636–1.500)              |
| Female                                 | 1.152<br>(.902–1.470)                            | 1.280 <sup>+</sup><br>(.987–1.659) | 1.073<br>(.804–1.431)              | 1.411*<br>(1.079–1.844)           |
| Constant                               | 2.418***<br>(1.554–3.763)                        | 1.384<br>(.830–2.309)              | 1.885**<br>(1.226–2.899)           | 1.360<br>(.854–2.166)             |
| Observations                           | 3,511                                            | 2,930                              | 2,691                              | 2,830                             |
| Residual Deviance                      | 4,647                                            | 3,945                              | 3,655                              | 3,864                             |
| Null Deviance                          | 4,730                                            | 4,036                              | 3,704                              | 3,916                             |

*Note:*

<sup>+</sup>p<0.1; \*p<0.05; \*\*p<0.01; \*\*\*p<0.001

|                                        | <i>Dependent variable:</i>             |                         |                                  |                                    |
|----------------------------------------|----------------------------------------|-------------------------|----------------------------------|------------------------------------|
|                                        | Trust on health topics from the radios |                         |                                  |                                    |
|                                        | Hints 4 Cycle 1 (2011)                 | Hints 4 Cycle 4 (2014)  | Hints 5 Cycle 1 (2017)           | Hints 5 Cycle 2 (2018)             |
| Patient Centered Communication         | 1.029<br>(.941–1.528)                  | 1.037<br>(.979–1.651)   | 1.113<br>(1.037–1.510)           | 1.021<br>(.650–1.154)              |
| Region: Midwest                        | .636*<br>(.516–1.021)                  | 1.063<br>(.663–1.436)   | .749<br>(.462–1.023)             | 1.184<br>(.580–1.284)              |
| Region: South                          | .863<br>(.604–1.214)                   | .834<br>(.591–1.307)    | .880<br>(.514–1.054)             | 1.083<br>(.646–1.248)              |
| Region: West                           | .749<br>(.593–1.178)                   | .863<br>(.747–1.561)    | .643 <sup>+</sup><br>(.469–.997) | 1.016<br>(.602–1.256)              |
| Hispanic                               | 2.028***<br>(.403–.831)                | 1.694*<br>(.354–.745)   | 1.265<br>(.600–1.458)            | 1.846**<br>(.569–1.149)            |
| Non-Hispanic Black or African American | 1.728*<br>(.537–1.278)                 | 1.778**<br>(.790–2.023) | 1.217<br>(.508–1.025)            | 3.575***<br>(.900–1.993)           |
| Non-Hispanic Other                     | 1.493<br>(.677–2.026)                  | .711<br>(.538–2.285)    | 1.603<br>(.501–1.916)            | .882<br>(.483–2.167)               |
| Hispanic Asian                         | 2.414**<br>(.470–1.502)                | 1.794<br>(.876–3.284)   | 2.120*<br>(.986–2.859)           | 2.054 <sup>+</sup><br>(.526–2.405) |
| Age: 35-49                             | .695 <sup>+</sup><br>(.543–1.131)      | 1.403<br>(.621–1.381)   | 1.140<br>(.539–1.012)            | 1.033<br>(.758–1.778)              |
| Age: 50-64                             | 1.000<br>(.436–.829)                   | 1.329<br>(.614–1.265)   | 1.510<br>(.612–1.197)            | 1.015<br>(.655–1.532)              |
| Age: 65-74                             | .686 <sup>+</sup><br>(.296–.635)       | 1.198<br>(.438–.999)    | 1.072<br>(.474–1.056)            | 1.115<br>(.423–1.048)              |
| Age: 75+                               | .667 <sup>+</sup><br>(.351–.800)       | 1.127<br>(.390–.959)    | 1.218<br>(.403–.911)             | 1.068<br>(.636–1.500)              |
| Female                                 | .852<br>(.902–1.470)                   | 1.068<br>(.987–1.659)   | 1.036<br>(.804–1.431)            | 1.112<br>(1.079–1.844)             |
| Constant                               | .581*<br>(1.554–3.763)                 | .255***<br>(.830–2.309) | .279***<br>(1.226–2.899)         | .203***<br>(.854–2.166)            |
| Observations                           | 3,441                                  | 2,893                   | 2,665                            | 2,796                              |
| Residual Deviance                      | 4,207                                  | 3,313                   | 2,937                            | 3,058                              |
| Null Deviance                          | 4,339                                  | 3,364                   | 2,979                            | 3,171                              |

*Note:*

<sup>+</sup>p<0.1; \*p<0.05; \*\*p<0.01; \*\*\*p<0.001

|                                        | <i>Dependent variable:</i>                   |                        |                        |                        |
|----------------------------------------|----------------------------------------------|------------------------|------------------------|------------------------|
|                                        | Trust about medical topics from the internet |                        |                        |                        |
|                                        | Hints 4 Cycle 1 (2011)                       | Hints 4 Cycle 4 (2014) | Hints 5 Cycle 1 (2017) | Hints 5 Cycle 2 (2018) |
| Patient Centered Communication         | 1.308*                                       | 1.164                  | 1.564**                | 1.024                  |
|                                        | (1.045–1.638)                                | (.833–1.628)           | (1.190–2.054)          | (.756–1.387)           |
| Region: Midwest                        | 1.001                                        | .992                   | .661*                  | 1.216                  |
|                                        | (.655–1.529)                                 | (.614–1.603)           | (.461–.948)            | (.805–1.839)           |
| Region: South                          | .815                                         | .968                   | .617*                  | 1.416*                 |
|                                        | (.574–1.157)                                 | (.627–1.493)           | (.422–.904)            | (1.030–1.947)          |
| Region: West                           | .962                                         | 1.206                  | .689 <sup>+</sup>      | 1.410                  |
|                                        | (.655–1.414)                                 | (.776–1.874)           | (.466–1.018)           | (.888–2.238)           |
| Hispanic                               | 1.134                                        | .875                   | .984                   | .876                   |
|                                        | (.770–1.668)                                 | (.582–1.315)           | (.622–1.558)           | (.634–1.210)           |
| Non-Hispanic Black or African American | .656                                         | 1.663                  | .793                   | 1.001                  |
|                                        | (.401–1.073)                                 | (.893–3.095)           | (.529–1.188)           | (.667–1.502)           |
| Non-Hispanic Other                     | .530 <sup>+</sup>                            | .686                   | .810                   | .608                   |
|                                        | (.256–1.097)                                 | (.314–1.496)           | (.389–1.687)           | (.256–1.441)           |
| Hispanic Asian                         | 1.911*                                       | 1.133                  | 2.140*                 | 1.639                  |
|                                        | (1.059–3.449)                                | (.425–3.026)           | (1.085–4.221)          | (.765–3.509)           |
| Age: 35-49                             | .861                                         | 1.350                  | .941                   | 1.261                  |
|                                        | (.540–1.375)                                 | (.895–2.035)           | (.562–1.576)           | (.735–2.161)           |
| Age: 50-64                             | 1.083                                        | 1.411*                 | 1.027                  | 1.333                  |
|                                        | (.682–1.721)                                 | (1.027–1.939)          | (.688–1.535)           | (.826–2.149)           |
| Age: 65-74                             | .504**                                       | .893                   | .686*                  | 1.286                  |
|                                        | (.328–.774)                                  | (.623–1.279)           | (.493–.955)            | (.794–2.082)           |
| Age: 75+                               | .221***                                      | .695                   | .329***                | .577*                  |
|                                        | (.132–.369)                                  | (.432–1.120)           | (.194–.560)            | (.357–.932)            |
| Female                                 | 1.319*                                       | 1.612***               | 1.235                  | 1.433*                 |
|                                        | (1.020–1.707)                                | (1.258–2.066)          | (.950–1.604)           | (1.095–1.876)          |
| Constant                               | 3.464***                                     | 1.584*                 | 3.067***               | 1.260                  |
|                                        | (2.119–5.663)                                | (1.030–2.435)          | (2.023–4.648)          | (.701–2.262)           |
| Observations                           | 3,424                                        | 2,910                  | 2,671                  | 2,820                  |
| Residual Deviance                      | 3,651                                        | 3,430                  | 3,130                  | 3,496                  |
| Null Deviance                          | 3,815                                        | 3,511                  | 3,235                  | 3,561                  |

*Note:*

<sup>+</sup>p<0.1; \*p<0.05; \*\*p<0.01; \*\*\*p<0.001

|                                        | <i>Dependent variable:</i>                  |                                    |                                     |                           |
|----------------------------------------|---------------------------------------------|------------------------------------|-------------------------------------|---------------------------|
|                                        | Trust information on medical topics from TV |                                    |                                     |                           |
|                                        | Hints 4 Cycle 1 (2011)                      | Hints 4 Cycle 4 (2014)             | Hints 5 Cycle 1 (2017)              | Hints 5 Cycle 2 (2018)    |
| Patient Centered Communication         | 1.286 <sup>+</sup><br>(.998–1.657)          | 1.048<br>(.795–1.381)              | 1.009<br>(.785–1.297)               | 1.157<br>(.876–1.528)     |
| Region: Midwest                        | .787<br>(.582–1.064)                        | 1.027<br>(.654–1.611)              | .686<br>(.438–1.074)                | .856<br>(.524–1.398)      |
| Region: South                          | .775<br>(.566–1.061)                        | .766<br>(.516–1.137)               | .816<br>(.599–1.111)                | 1.246<br>(.910–1.707)     |
| Region: West                           | .667*<br>(.471–.945)                        | .698<br>(.443–1.099)               | .588**<br>(.415–.832)               | .953<br>(.638–1.422)      |
| Hispanic                               | 2.219***<br>(1.597–3.084)                   | 3.007***<br>(1.967–4.598)          | 1.510 <sup>+</sup><br>(.980–2.325)  | 2.193***<br>(1.469–3.274) |
| Non-Hispanic Black or African American | 2.429***<br>(1.614–3.655)                   | 3.351***<br>(2.103–5.339)          | 1.974**<br>(1.280–3.047)            | 3.101***<br>(2.153–4.466) |
| Non-Hispanic Other                     | 1.296<br>(.672–2.500)                       | .688<br>(.287–1.651)               | 1.442<br>(.654–3.183)               | 1.294<br>(.484–3.457)     |
| Hispanic Asian                         | 3.033**<br>(1.567–5.869)                    | 1.929 <sup>+</sup><br>(.915–4.068) | 2.574**<br>(1.392–4.759)            | 3.202*<br>(1.362–7.529)   |
| Age: 35-49                             | 1.021<br>(.714–1.460)                       | 1.249<br>(.836–1.866)              | 1.510<br>(.894–2.550)               | 1.313<br>(.866–1.990)     |
| Age: 50-64                             | 1.145<br>(.833–1.573)                       | 1.294<br>(.876–1.910)              | 1.777*<br>(1.133–2.789)             | 1.864**<br>(1.221–2.846)  |
| Age: 65-74                             | .865<br>(.610–1.228)                        | 1.353<br>(.907–2.019)              | 1.722 <sup>+</sup><br>(1.011–2.935) | 1.959***<br>(1.392–2.758) |
| Age: 75+                               | .671*<br>(.470–.960)                        | 1.340<br>(.842–2.132)              | 1.860 <sup>+</sup><br>(.966–3.583)  | 2.137**<br>(1.325–3.447)  |
| Female                                 | 1.084<br>(.849–1.384)                       | 1.036<br>(.794–1.351)              | 1.119<br>(.847–1.479)               | 1.099<br>(.893–1.354)     |
| Constant                               | .615*<br>(.414–.912)                        | .426**<br>(.250–.726)              | .347**<br>(.182–.662)               | .206***<br>(.135–.312)    |
| Observations                           | 3,480                                       | 2,922                              | 2,677                               | 2,802                     |
| Residual Deviance                      | 4,593                                       | 3,747                              | 3,318                               | 3,404                     |
| Null Deviance                          | 4,761                                       | 3,930                              | 3,416                               | 3,594                     |

*Note:*

<sup>+</sup>p<0.1; \*p<0.05; \*\*p<0.01; \*\*\*p<0.001

|                                        | <i>Dependent variable:</i>         |                                                |                                    |                           |
|----------------------------------------|------------------------------------|------------------------------------------------|------------------------------------|---------------------------|
|                                        | Hints 4 Cycle 1 (2011)             | Trust information from newspapers or magazines |                                    | Hints 5 Cycle 2 (2018)    |
|                                        | Hints 4 Cycle 1 (2011)             | Hints 4 Cycle 4 (2014)                         | Hints 5 Cycle 1 (2017)             | Hints 5 Cycle 2 (2018)    |
| Patient Centered Communication         | .985<br>(.803–1.208)               | 1.199<br>(.900–1.597)                          | 1.140<br>(.882–1.473)              | 1.077<br>(.810–1.431)     |
| Region: Midwest                        | .716 <sup>+</sup><br>(.507–1.011)  | 1.285<br>(.870–1.898)                          | .619 <sup>+</sup><br>(.381–1.005)  | 1.288<br>(.802–2.068)     |
| Region: South                          | .856<br>(.643–1.139)               | 1.119<br>(.801–1.564)                          | .732<br>(.465–1.151)               | 1.192<br>(.907–1.568)     |
| Region: West                           | .728 <sup>+</sup><br>(.521–1.018)  | 1.022<br>(.634–1.646)                          | .628*<br>(.409–.964)               | 1.156<br>(.762–1.755)     |
| Hispanic                               | 1.396 <sup>+</sup><br>(.952–2.046) | 1.180<br>(.761–1.829)                          | 1.279<br>(.828–1.976)              | 1.117<br>(.773–1.614)     |
| Non-Hispanic Black or African American | 1.029<br>(.693–1.529)              | 2.162***<br>(1.479–3.160)                      | 1.198<br>(.776–1.848)              | 2.383***<br>(1.637–3.469) |
| Non-Hispanic Other                     | 1.426<br>(.734–2.773)              | .604<br>(.303–1.205)                           | .647<br>(.309–1.353)               | .850<br>(.454–1.589)      |
| Hispanic Asian                         | 1.626<br>(.921–2.869)              | 2.673**<br>(1.388–5.146)                       | 2.055*<br>(1.157–3.653)            | 1.760<br>(.833–3.718)     |
| Age: 35-49                             | .852<br>(.603–1.204)               | 1.123<br>(.775–1.629)                          | 1.228<br>(.829–1.819)              | 1.197<br>(.786–1.821)     |
| Age: 50-64                             | 1.012<br>(.703–1.457)              | 1.012<br>(.732–1.398)                          | 1.351 <sup>+</sup><br>(.981–1.859) | 1.039<br>(.660–1.638)     |
| Age: 65-74                             | .682*<br>(.473–.983)               | .924<br>(.659–1.295)                           | 1.005<br>(.693–1.456)              | .938<br>(.585–1.504)      |
| Age: 75+                               | .702 <sup>+</sup><br>(.481–1.024)  | .865<br>(.594–1.260)                           | 1.056<br>(.613–1.817)              | 1.227<br>(.732–2.057)     |
| Female                                 | 1.220 <sup>+</sup><br>(.972–1.531) | 1.288*<br>(1.011–1.640)                        | 1.240<br>(.965–1.593)              | 1.263<br>(.953–1.676)     |
| Constant                               | .985<br>(.631–1.538)               | .525**<br>(.341–.808)                          | .718<br>(.430–1.199)               | .411**<br>(.232–.727)     |
| Observations                           | 3,486                              | 2,918                                          | 2,685                              | 2,812                     |
| Residual Deviance                      | 4,782                              | 3,988                                          | 3,614                              | 3,764                     |
| Null Deviance                          | 4,837                              | 4,084                                          | 3,677                              | 3,839                     |

*Note:*

<sup>+</sup>p<0.1; \*p<0.05; \*\*p<0.01; \*\*\*p<0.001

|                                        | <i>Dependent variable:</i>                          |                             |                                  |                              |
|----------------------------------------|-----------------------------------------------------|-----------------------------|----------------------------------|------------------------------|
|                                        | How much would you trust information from a doctor? |                             |                                  |                              |
|                                        | Hints 4 Cycle 1 (2011)                              | Hints 4 Cycle 4 (2014)      | Hints 5 Cycle 1 (2017)           | Hints 5 Cycle 2 (2018)       |
| Chance to ask questions                | 1.846<br>(.860–3.960)                               | .752<br>(.257–2.198)        | 7.215*<br>(1.511–34.455)         | .381<br>(.110–1.315)         |
| Feelings addressed                     | .759<br>(.340–1.692)                                | 1.485<br>(.769–2.867)       | .294+<br>(.073–1.179)            | 3.659*<br>(1.357–9.867)      |
| Involved decisions                     | 2.107+<br>(.949–4.677)                              | 1.255<br>(.612–2.572)       | 1.948<br>(.410–9.246)            | 1.909<br>(.703–5.186)        |
| Understood next steps                  | 3.102**<br>(1.626–5.918)                            | 3.998***<br>(2.076–7.701)   | .717<br>(.163–3.154)             | .626<br>(.203–1.937)         |
| Help with uncertainty                  | .846<br>(.418–1.713)                                | 1.884<br>(.830–4.277)       | 1.851<br>(.562–6.100)            | 1.955+<br>(1.009–3.791)      |
| Region: Midwest                        | 1.104<br>(.357–3.419)                               | .629<br>(.208–1.902)        | .592<br>(.207–1.695)             | 1.157<br>(.357–3.748)        |
| Region: South                          | .476+<br>(.202–1.118)                               | .746<br>(.301–1.849)        | .449<br>(.155–1.302)             | .663<br>(.285–1.542)         |
| Region: West                           | .668<br>(.275–1.623)                                | .647<br>(.276–1.518)        | .663<br>(.248–1.773)             | .983<br>(.279–3.462)         |
| Hispanic                               | .670<br>(.302–1.489)                                | .736<br>(.304–1.782)        | .387+<br>(.135–1.107)            | .611<br>(.175–2.128)         |
| Non-Hispanic Black or African American | 1.641<br>(.785–3.427)                               | 1.313<br>(.427–4.039)       | .858<br>(.172–4.289)             | .631<br>(.250–1.592)         |
| Non-Hispanic Other                     | 1.777<br>(.399–7.919)                               | .835<br>(.147–4.733)        | .247*<br>(.069–.889)             | .913<br>(.129–6.443)         |
| Hispanic Asian                         | .795<br>(.226–2.795)                                | .334<br>(.076–1.466)        | 5.161<br>(.538–49.503)           | 4.872<br>(-)                 |
| Age: 35-49                             | .653<br>(.237–1.800)                                | .413<br>(.134–1.275)        | .045**<br>(.008–.242)            | 1.287<br>(.392–4.224)        |
| Age: 50-64                             | .378*<br>(.156–.915)                                | .537<br>(.184–1.566)        | .039***<br>(.009–.165)           | .650<br>(.169–2.491)         |
| Age: 65-74                             | .412*<br>(.187–.906)                                | .456<br>(.128–1.617)        | .024***<br>(.005–.114)           | 1.514<br>(.389–5.889)        |
| Age: 75+                               | .399<br>(.136–1.173)                                | .562<br>(.154–2.045)        | .044**<br>(.006–.311)            | 1.009<br>(.220–4.637)        |
| Female                                 | .838<br>(.491–1.432)                                | .890<br>(.526–1.508)        | .671<br>(.334–1.347)             | .730<br>(.377–1.413)         |
| Constant                               | 15.771***<br>(5.236–47.503)                         | 12.496***<br>(3.697–42.241) | 488.802***<br>(94.188–2,536.699) | 31.151***<br>(8.258–117.510) |
| Observations                           | 2,940                                               | 2,509                       | 2,302                            | 2,439                        |
| Residual Deviance                      | 785                                                 | 705                         | 506                              | 565                          |
| Null Deviance                          | 877                                                 | 807                         | 603                              | 642                          |

*Note:*

+p<0.1; \*p<0.05; \*\*p<0.01; \*\*\*p<0.001
